# Supplementary material for: A Novel Urinary miRNA Biomarker for Early Detection of Colorectal Cancer
Source: MDPI journal article supplement (doi:10.3390/cancers14020461), 2022-01-17
Supplement: s1 [file s1]

# **Supplementary Tables S1–S4**

**Supplementary Table S1. TaqMan Advanced miRNA Assays for qRT-PCR.**

| Assay Name       | Assay ID   | Context Sequence        |
|------------------|------------|-------------------------|
| hsa-miR-129-1-3p | 480873_mir | AAGCCCUUACCCCAAAAAGUAU  |
| hsa-miR-566      | 479373_mir | GGGCGCCUGUGAUCCCAAC     |
| hsa-miR-598-5p   | 479080_mir | GCGGUGAUCCCGAUGGUGUGAGC |
| hsa-miR-4669     | 478925_mir | UGUGUCCGGGAAGUGGAGGAGG  |
| hsa-miR-6756-5p  | 480284_mir | AGGGUGGGGCUGGAGGUGGGGCU |

**Supplementary Table S2. Urinary miRNA biomarker in the patients with well to poorly differentiated CRC.**

|                      |                       | miR-129-1-3p ( $2^{-\Delta\text{Ct}}$ , Median, IQR) | <i>p</i> Value | miR-566 ( $2^{-\Delta\text{Ct}}$ , Median, IQR) | <i>p</i> Value |
|----------------------|-----------------------|------------------------------------------------------|----------------|-------------------------------------------------|----------------|
| HC ( <i>n</i> = 203) |                       | 0.00040 (0.00016–0.00096)                            |                | 0.048 (0.026–0.140)                             |                |
| CRC                  | tub ( <i>n</i> = 186) | 0.00145 (0.00086–0.00292)                            | < 0.001*       | 0.200 (0.082–0.473)                             | < 0.001*       |
|                      | por ( <i>n</i> = 17)  | 0.00152 (0.00081–0.00262)                            | < 0.001*       | 0.136 (0.042–0.343)                             | 0.064*         |

Ct, threshold cycle; IQR, interquartile range; HC, healthy control; CRC, colorectal cancer; tub, well to moderate differentiated adenocarcinoma; por, poorly differentiated adenocarcinoma

\* *P* values were calculated in comparison with HC.

**Supplementary Table S3. Expression of miR-129-1-3p and miR-566 in serum sample.**

|                     |                                      | <b>HC</b>                                  | <b>CRC</b>                                  | <b><i>p</i> Value</b> |
|---------------------|--------------------------------------|--------------------------------------------|---------------------------------------------|-----------------------|
|                     |                                      | <b>(<i>n</i> = 24)</b>                     | <b>(<i>n</i> = 24)</b>                      |                       |
| <b>miR-129-1-3p</b> | <b>2<sup>-ΔCt</sup>, Median, IQR</b> | <b>0.00259</b><br><b>(0.00081–0.00756)</b> | <b>0.00445</b><br><b>(0.00292 –0.00740)</b> | <b>0.071</b>          |
| <b>miR-566</b>      | <b>2<sup>-ΔCt</sup>, Median, IQR</b> | <b>0.259</b><br><b>(0.113–1.976)</b>       | <b>1.304</b><br><b>(0.471–1.984)</b>        | <b>0.027</b>          |

**HC, healthy control; CRC, colorectal cancer; IQR, interquartile range; Ct, threshold cycle;**

**Supplementary Table S4. Characteristics of the patients with CRC for tissue miRNA analysis.**

| <b>ID</b> | <b>Age (years)</b> | <b>Gender</b> | <b>Location</b> | <b>Stage</b> | <b>Histological grade</b> |
|-----------|--------------------|---------------|-----------------|--------------|---------------------------|
| CRC1      | 55                 | Male          | Sigmoid         | IIIB         | moderately differentiated |
| CRC2      | 74                 | Female        | Cecum           | IIA          | poorly differentiated     |
| CRC3      | 73                 | Female        | Sigmoid         | IIA          | well differentiated       |
| CRC4      | 44                 | Male          | Rectum          | IIA          | well differentiated       |
| CRC5      | 38                 | Female        | Sigmoid         | IIA          | well differentiated       |
| CRC6      | 80                 | Female        | Sigmoid         | IIIB         | well differentiated       |
| CRC7      | 69                 | Female        | Ascending       | IIIC         | poorly differentiated     |
| CRC8      | 83                 | Female        | Transverse      | IIA          | moderately differentiated |
| CRC9      | 68                 | Male          | Sigmoid         | IIIB         | well differentiated       |
| CRC10     | 69                 | Female        | Ascending       | IIA          | moderately differentiated |
| CRC11     | 52                 | Male          | Transverse      | IIA          | moderately differentiated |
| CRC12     | 70                 | Female        | Sigmoid         | IIIB         | moderately differentiated |
| CRC13     | 73                 | Female        | Cecum           | IIIB         | mucinous                  |
| CRC14     | 77                 | Male          | Sigmoid         | IIB          | well differentiated       |
| CRC15     | 78                 | Female        | Cecum           | IIA          | well differentiated       |
| CRC16     | 74                 | Male          | Rectum          | IIA          | moderately differentiated |
| CRC17     | 72                 | Male          | Rectum          | IIA          | moderately differentiated |
| CRC18     | 68                 | Male          | Sigmoid         | IIA          | well differentiated       |
| CRC19     | 52                 | Male          | Ascending       | IIIB         | poorly differentiated     |
| CRC20     | 70                 | Male          | Ascending       | IIA          | well differentiated       |
| CRC21     | 75                 | Female        | Rectum          | IIIB         | moderately differentiated |

|              |           |             |                   |            |                            |
|--------------|-----------|-------------|-------------------|------------|----------------------------|
| <b>CRC22</b> | <b>69</b> | <b>Male</b> | <b>Sigmoid</b>    | <b>IIA</b> | <b>well differentiated</b> |
| <b>CRC23</b> | <b>76</b> | <b>Male</b> | <b>Transverse</b> | <b>IIA</b> | <b>well differentiated</b> |

---

# **Supplementary Figures S1–S5**

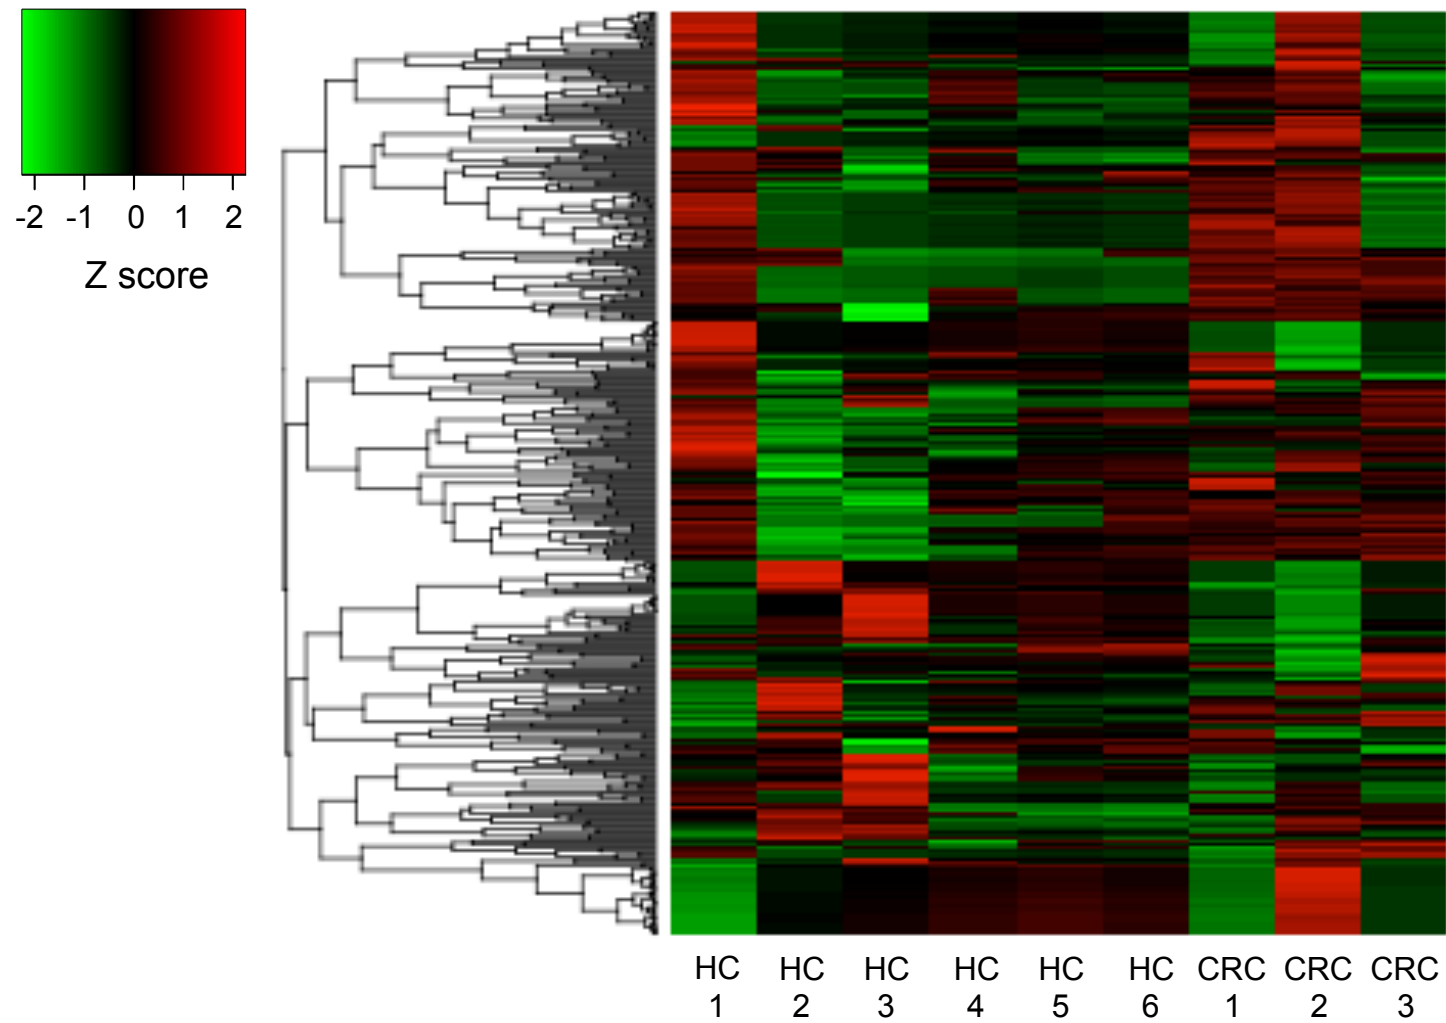

**Supplementary Figure S1. Urinary miRNA microarray in the discovery cohort.** HC, healthy control; CRC, colorectal cancer



**A**

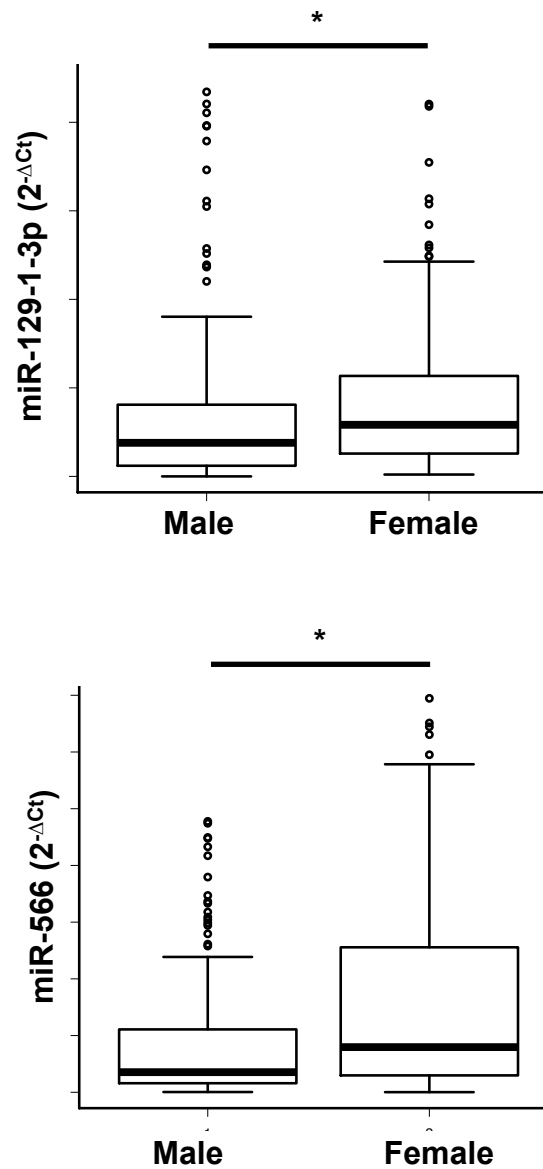

**B**

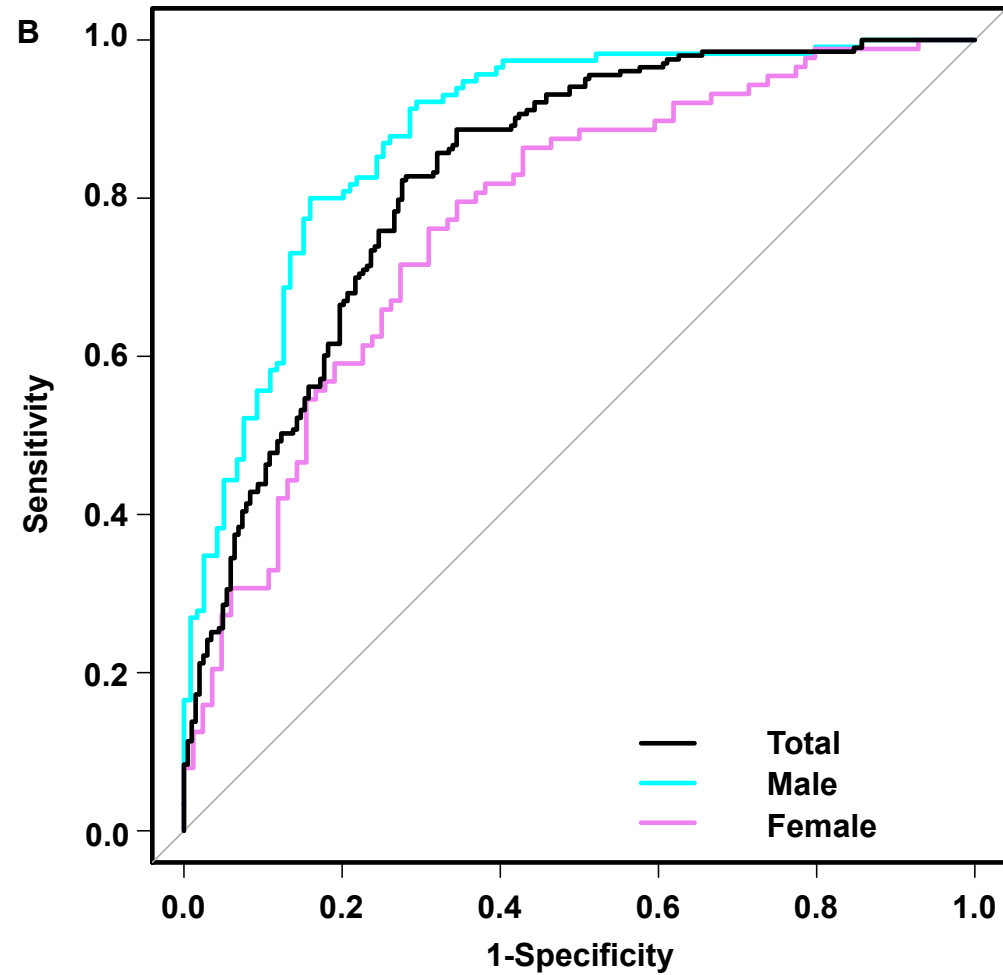

| miR-129-1-3p + miR-566 | AUC [95% CI]        |
|------------------------|---------------------|
| Total                  | 0.828 [0.789–0.868] |
| Male                   | 0.882 [0.839–0.925] |
| Female                 | 0.773 [0.703–0.843] |

**Supplementary Figure S2. Effect of gender on urinary biomarker. A. Boxplots according to genders, B. Receiver operator characteristics curve in the whole cohort.**

AUC, area under the curve; 95% CI, 95% confidence interval; \*  $p < 0.001$

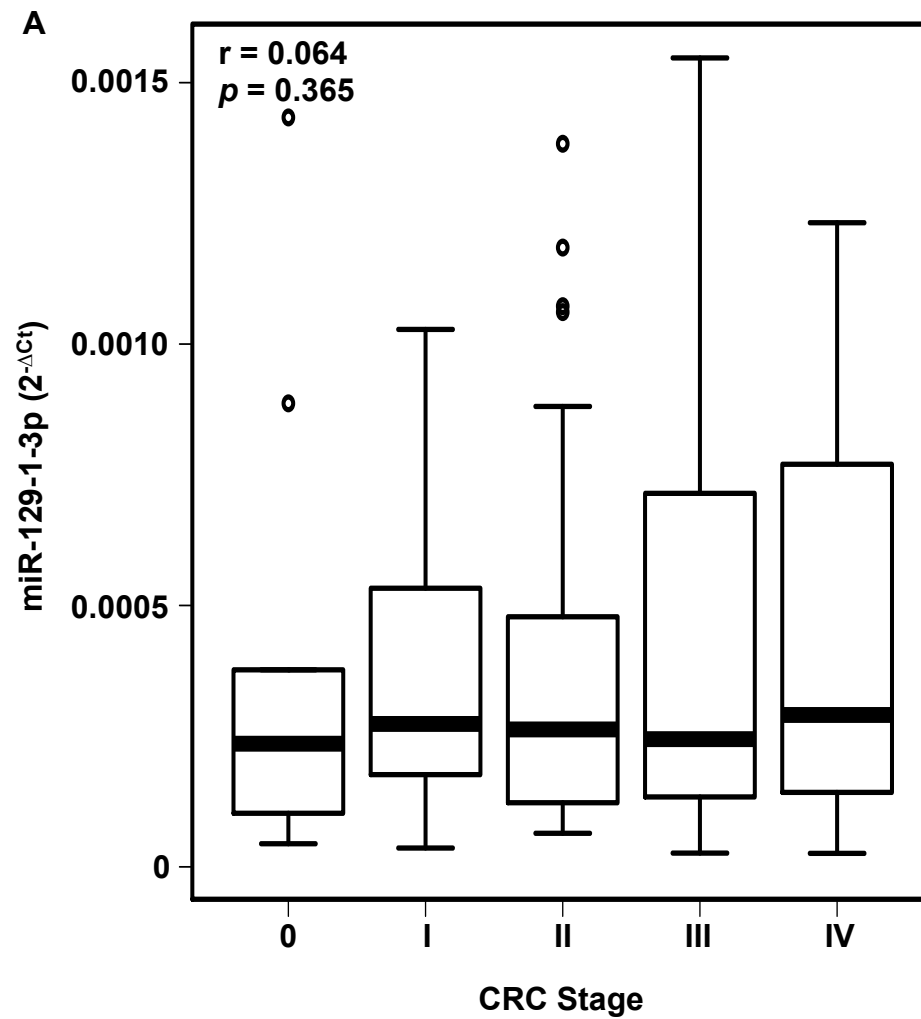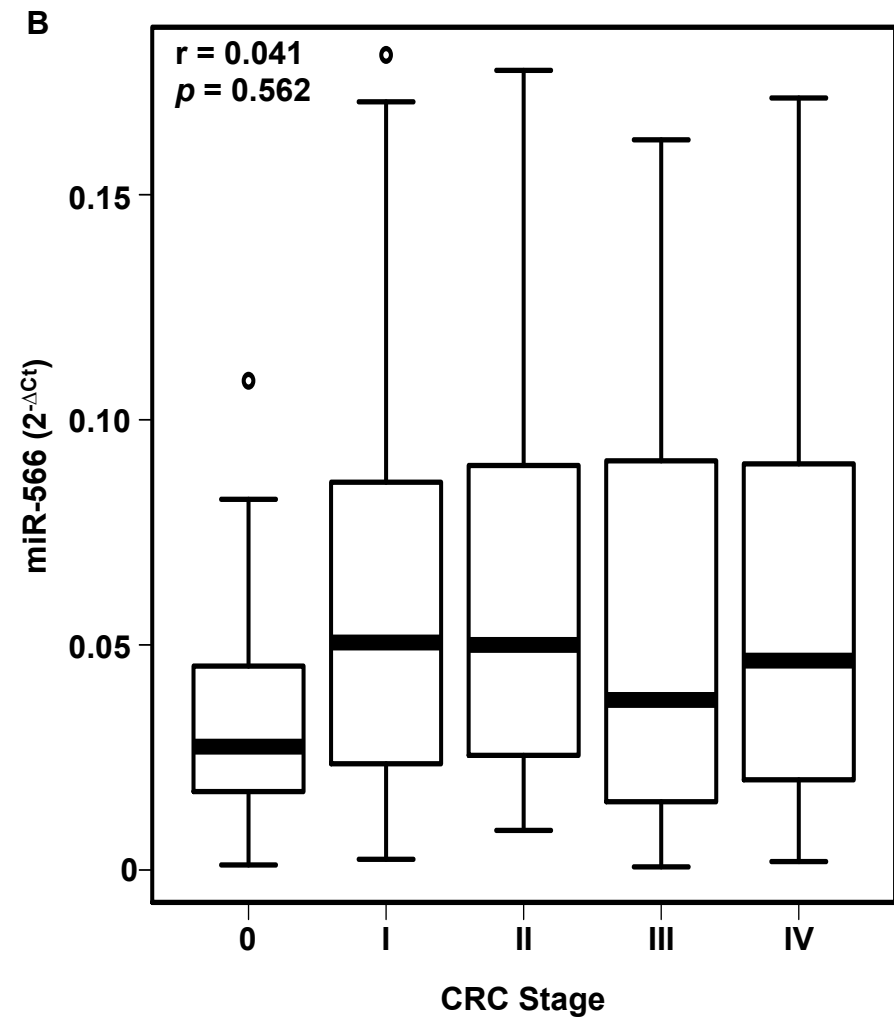

**Supplementary Figure S3. Correlation between urinary miRNA level and disease stage. A. miR-129-1-3p. B. miR-566.**

Ct, cycle threshold; CRC, colorectal cancer

Data were analyzed using the Spearman rank correlation.

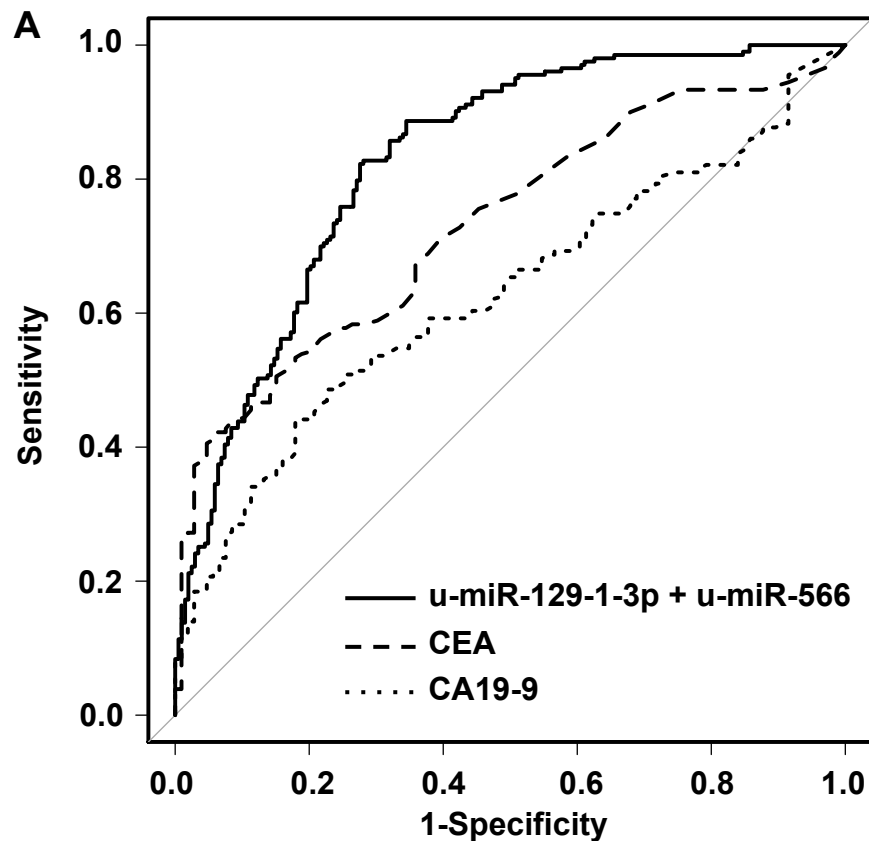

| Biomarker                     | AUC<br>[95% CI]        | Sensitivity<br>% | Specificity<br>% |
|-------------------------------|------------------------|------------------|------------------|
| CEA                           | 0.731<br>[0.674–0.789] | 46.7*            | 87.7*            |
| CA19-9                        | 0.627<br>[0.562–0.691] | 28.9*            | 90.6*            |
| u-miR-129-1-3p<br>+ u-miR-566 | 0.828<br>[0.789–0.868] | 82.8             | 71.9             |

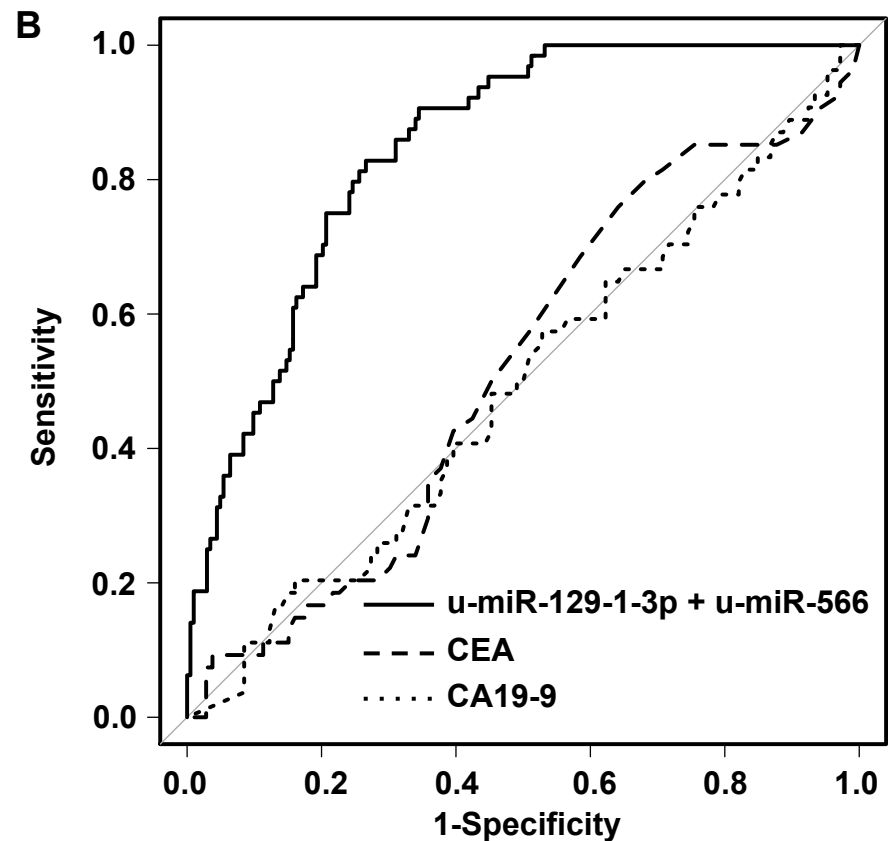

| Biomarker                     | AUC<br>[95% CI]        | Sensitivity<br>% | Specificity<br>% |
|-------------------------------|------------------------|------------------|------------------|
| CEA                           | 0.519<br>[0.425–0.613] | 11.1*            | 87.7*            |
| CA19-9                        | 0.490<br>[0.395–0.586] | 11.1*            | 90.6*            |
| u-miR-129-1-3p<br>+ u-miR-566 | 0.845<br>[0.798–0.893] | 82.8             | 73.4             |

**Supplementary Figure S4 Comparison between urinary biomarker and serum CEA/CA19-9.**

**A. All Stage CRC. B. Stage 0/I CRC**

\* The cut-off values for CEA and CA19-9 were 5ng/mL and 37U/mL, respectively.

u-miR-129-1-3p, urinary miR-129-1-3p; u-miR-566, urinary miR-566; AUC, area under the curve; 95% CI, 95% confidence interval

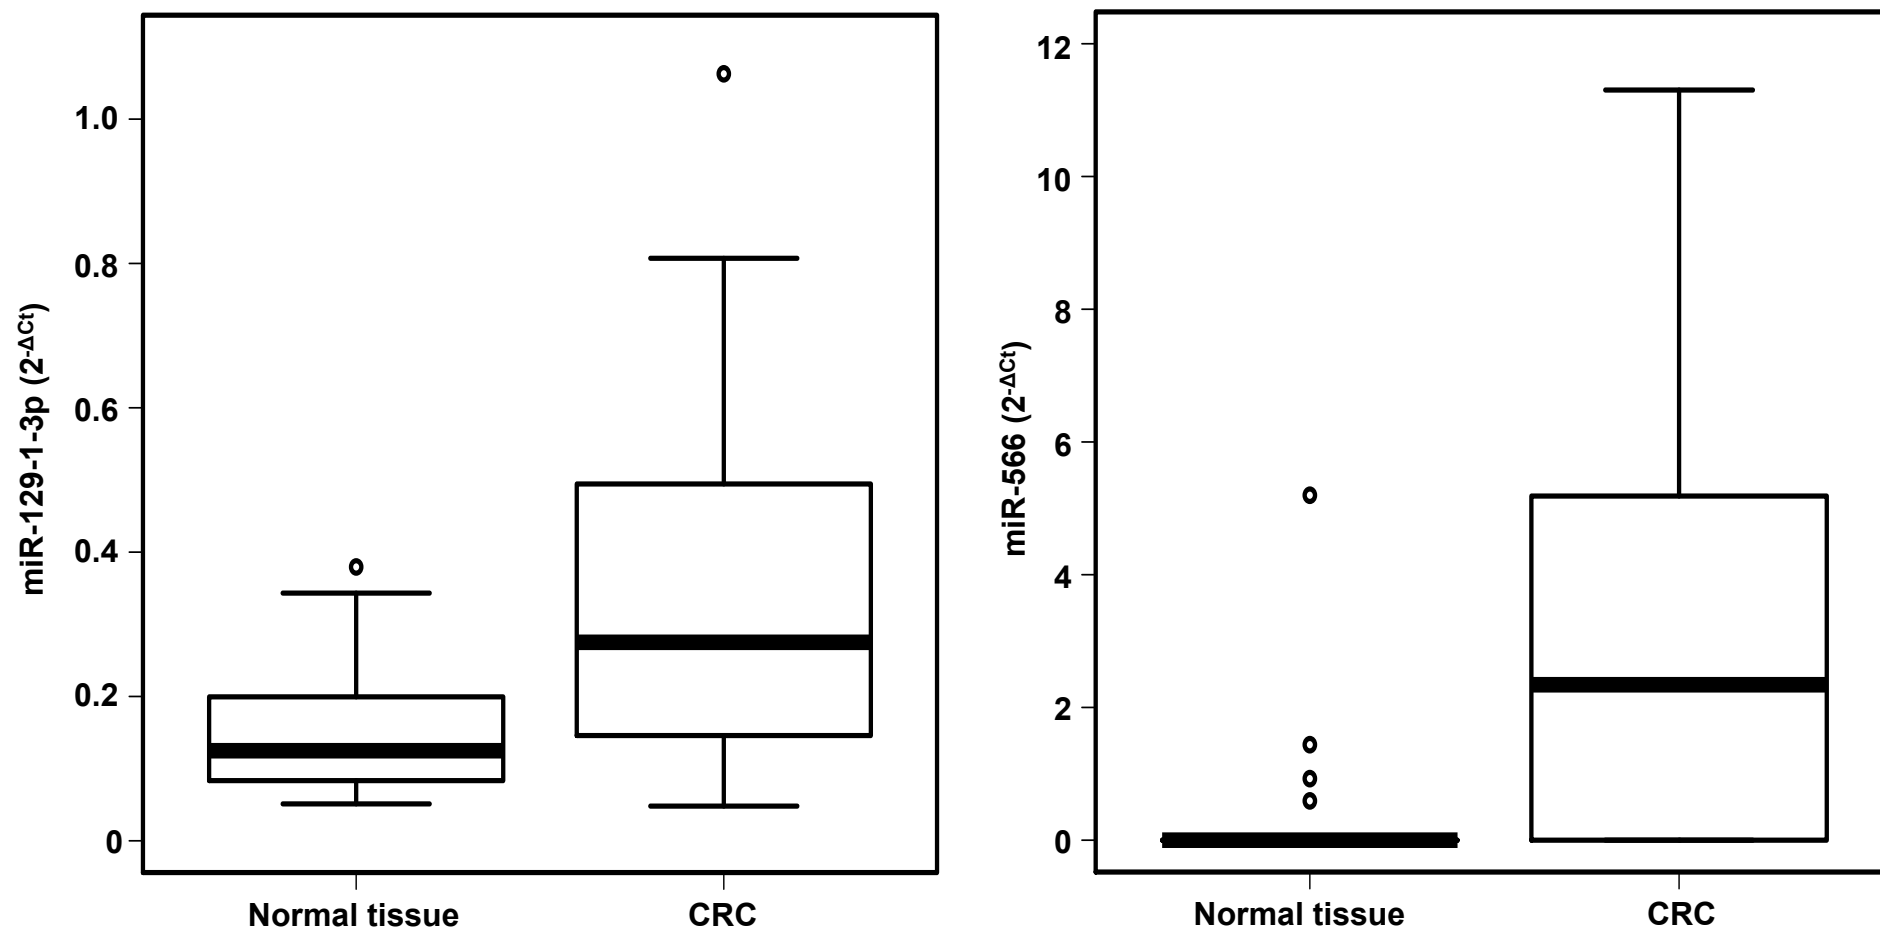

|              | 2 <sup>-ΔCt</sup> (Median, IQR) |                        | <i>p</i> Value |
|--------------|---------------------------------|------------------------|----------------|
|              | Normal tissue ( <i>n</i> = 23)  | CRC ( <i>n</i> = 23)   |                |
| miR-129-1-3p | 0.125<br>(0.083-0.199)          | 0.275<br>(0.146-0.494) | 0.008          |
| miR-566      | 0<br>(0-0)                      | 2.342<br>(0-5.185)     | 0.002          |

**Supplementary Figure S5. Expression of miR-129-1-3p and miR-566 in tissue sample.**  
Ct, cycle threshold; CRC, colorectal cancer; IQR, interquartile range
